# Supplementary material
Source: PubMed Central journal article supplement (PMC2925284)
Supplement: NIHMS221757-supplement-01.pdf [file NIHMS221757-supplement-01.pdf]

1  
2  
3  
4  
5  
6 **SUPPLEMENTARY DATA**

7  
8 **Supplementary data Table 1: Cohorts on which neurotechnology was used**

9  
10  
11  
12  
13  
14  
15  
16  
17  
18  
19  
20  
21  
22  
23  
24  
25  
26  
27  
28  
29  
30  
31  
32  
33  
34  
35  
36  
37  
38  
39  
40  
41  
42  
43  
44  
45  
46  
47  
48  
49

| Cohorts |                             | Description                  | %  |
|---------|-----------------------------|------------------------------|----|
| Human   | Embryo and fetus            | Unborn                       | 2  |
|         | Infants                     | Aged > 0 and < 3             | 2  |
|         | School-aged and adolescents | Aged $\geq 3$ and $\leq 18$  | 8  |
|         | Adults                      | Aged > 18 and < 65           | 27 |
|         | Aging                       | Aged $\geq 65$               | 6  |
|         | Not specified               | No statements qualifying age | 60 |
| Animal  | Research done on non-humans |                              | 5  |

**Supplementary data Table 2: Cited conditions (>1%) in clinical research and application in media coverage of neurotechnology**

|                                 | <b>Condition</b>                                                           | <b>ICD-10 code<sup>a</sup></b> | <b>Examples</b>                                                                                                 | <b>%</b> |
|---------------------------------|----------------------------------------------------------------------------|--------------------------------|-----------------------------------------------------------------------------------------------------------------|----------|
| Mental and behavioral disorders | Organic, including symptomatic, mental disorders                           | F00-F09                        | Dementia, Pick's disease, vascular dementia, dementia in Huntington's disease                                   | 11       |
|                                 | Mood [affective] disorders                                                 | F30-F39                        | Depression, manic episode, hypomania, mania, bipolar affective disorder, depressive episodes                    | 6        |
|                                 | Disorders due to psychoactive substance use                                | F10-F19                        | Disorders due to use of alcohol, cannabinoids, cocaine, stimulants (including caffeine, hallucinogens, tobacco) | 3        |
|                                 | Neurotic, stress-related and somatoform disorders                          | F40-F48                        | Phobic anxiety disorders, generalized anxiety, obsessive-compulsive disorder, post-traumatic stress disorder    | 3        |
|                                 | Behavioral and emotional disorders with onset in childhood and adolescence | F90-F98                        | Hyperkinetic disorders, attention deficit disorder with hyperactivity                                           | 3        |
|                                 | Schizophrenia and delusional disorders                                     | F20-F29                        | Schizophrenia, persistent delusional disorders, delusional disorder, schizoaffective disorders                  | 2        |
| Diseases of the nervous system  | Extrapyramidal and movement disorders                                      | G20-G26                        | Parkinson's disease, dystonia, essential tremor, drug-induced tics and other tics of organic origin             | 11       |
|                                 | Other degenerative diseases of the NS                                      | G30-G32                        | Alzheimer's disease (senile and presenile forms), circumscribed brain atrophy, Pick's disease                   | 10       |
|                                 | Episodic and paroxysmal disorders                                          | G40-G47                        | Epilepsy, status epilepticus, migraine, unspecified                                                             | 10       |
|                                 | Systemic atrophies primarily affecting the CNS                             | G10-G13                        | Huntington's disease, hereditary ataxia, late-onset cerebellar ataxia, motor neuron disease                     | 5        |
|                                 | Cerebral palsy and other paralytic syndromes                               | G80-G83                        | Infantile cerebral palsy, spastic cerebral palsy, hemiplegia, other paralytic syndromes                         | 4        |
| t h e r                         | Cerebrovascular diseases                                                   | I60-I69                        | Strokes, subarachnoid hemorrhage, intracerebral                                                                 | 4        |

|  |                      |                        |                                                                                  |   |
|--|----------------------|------------------------|----------------------------------------------------------------------------------|---|
|  |                      |                        | hemorrhage, cerebral aneurysm                                                    |   |
|  | Injuries to the head | S00-S09 and<br>S00-T98 | Intracranial injury with prolonged coma, injury of<br>cranial nerves, concussion | 3 |

<sup>a</sup> Site of the World Health Organization, ICD-10: <http://www3.who.int/icd/vol1htm2003/fr-icd.htm>

NS=nervous system; CNS= central nervous system

1  
2  
3  
4  
5  
6  
7  
8  
9  
10  
11  
12  
13  
14  
15  
16  
17  
18  
19  
20  
21  
22  
23  
24  
25  
26  
27  
28  
29  
30  
31  
32  
33  
34  
35  
36  
37  
38  
39  
40  
41  
42  
43  
44  
45  
46  
47  
48  
49

**Supplementary data Table 3: Cited areas of non-clinical research and application in media coverage of neurotechnology**

| <b>Area</b>            | <b>Example</b>                                                    | <b>%</b> |
|------------------------|-------------------------------------------------------------------|----------|
| Cognition              | Attention, memory, learning, sleep                                | 19       |
| Cognition (integrated) | Decision-making, intelligence, self-monitoring                    | 9        |
| Emotion and affect     | Emotional reactions, love, anger, sadness                         | 8        |
| Sensory – primary      | Primary sensory: vision, olfaction, audition, touch               | 7        |
| Methods and technology | Improvement of research method and devices                        | 6        |
| Sensory – integrated   | Processing or integrative sensory: object recognition, perception | 4        |
| Social behavior        | Consumer preferences, racial evaluation, cooperation              | 4        |
| Motor                  | Motor function                                                    | 2        |
